# Supplementary material for: CD73 Predicts Favorable Prognosis in Patients with Nonmuscle-Invasive Urothelial Bladder Cancer
Source: Hindawi journal article supplement (doi:10.1155/2015/785461), 2015-01-01

**A**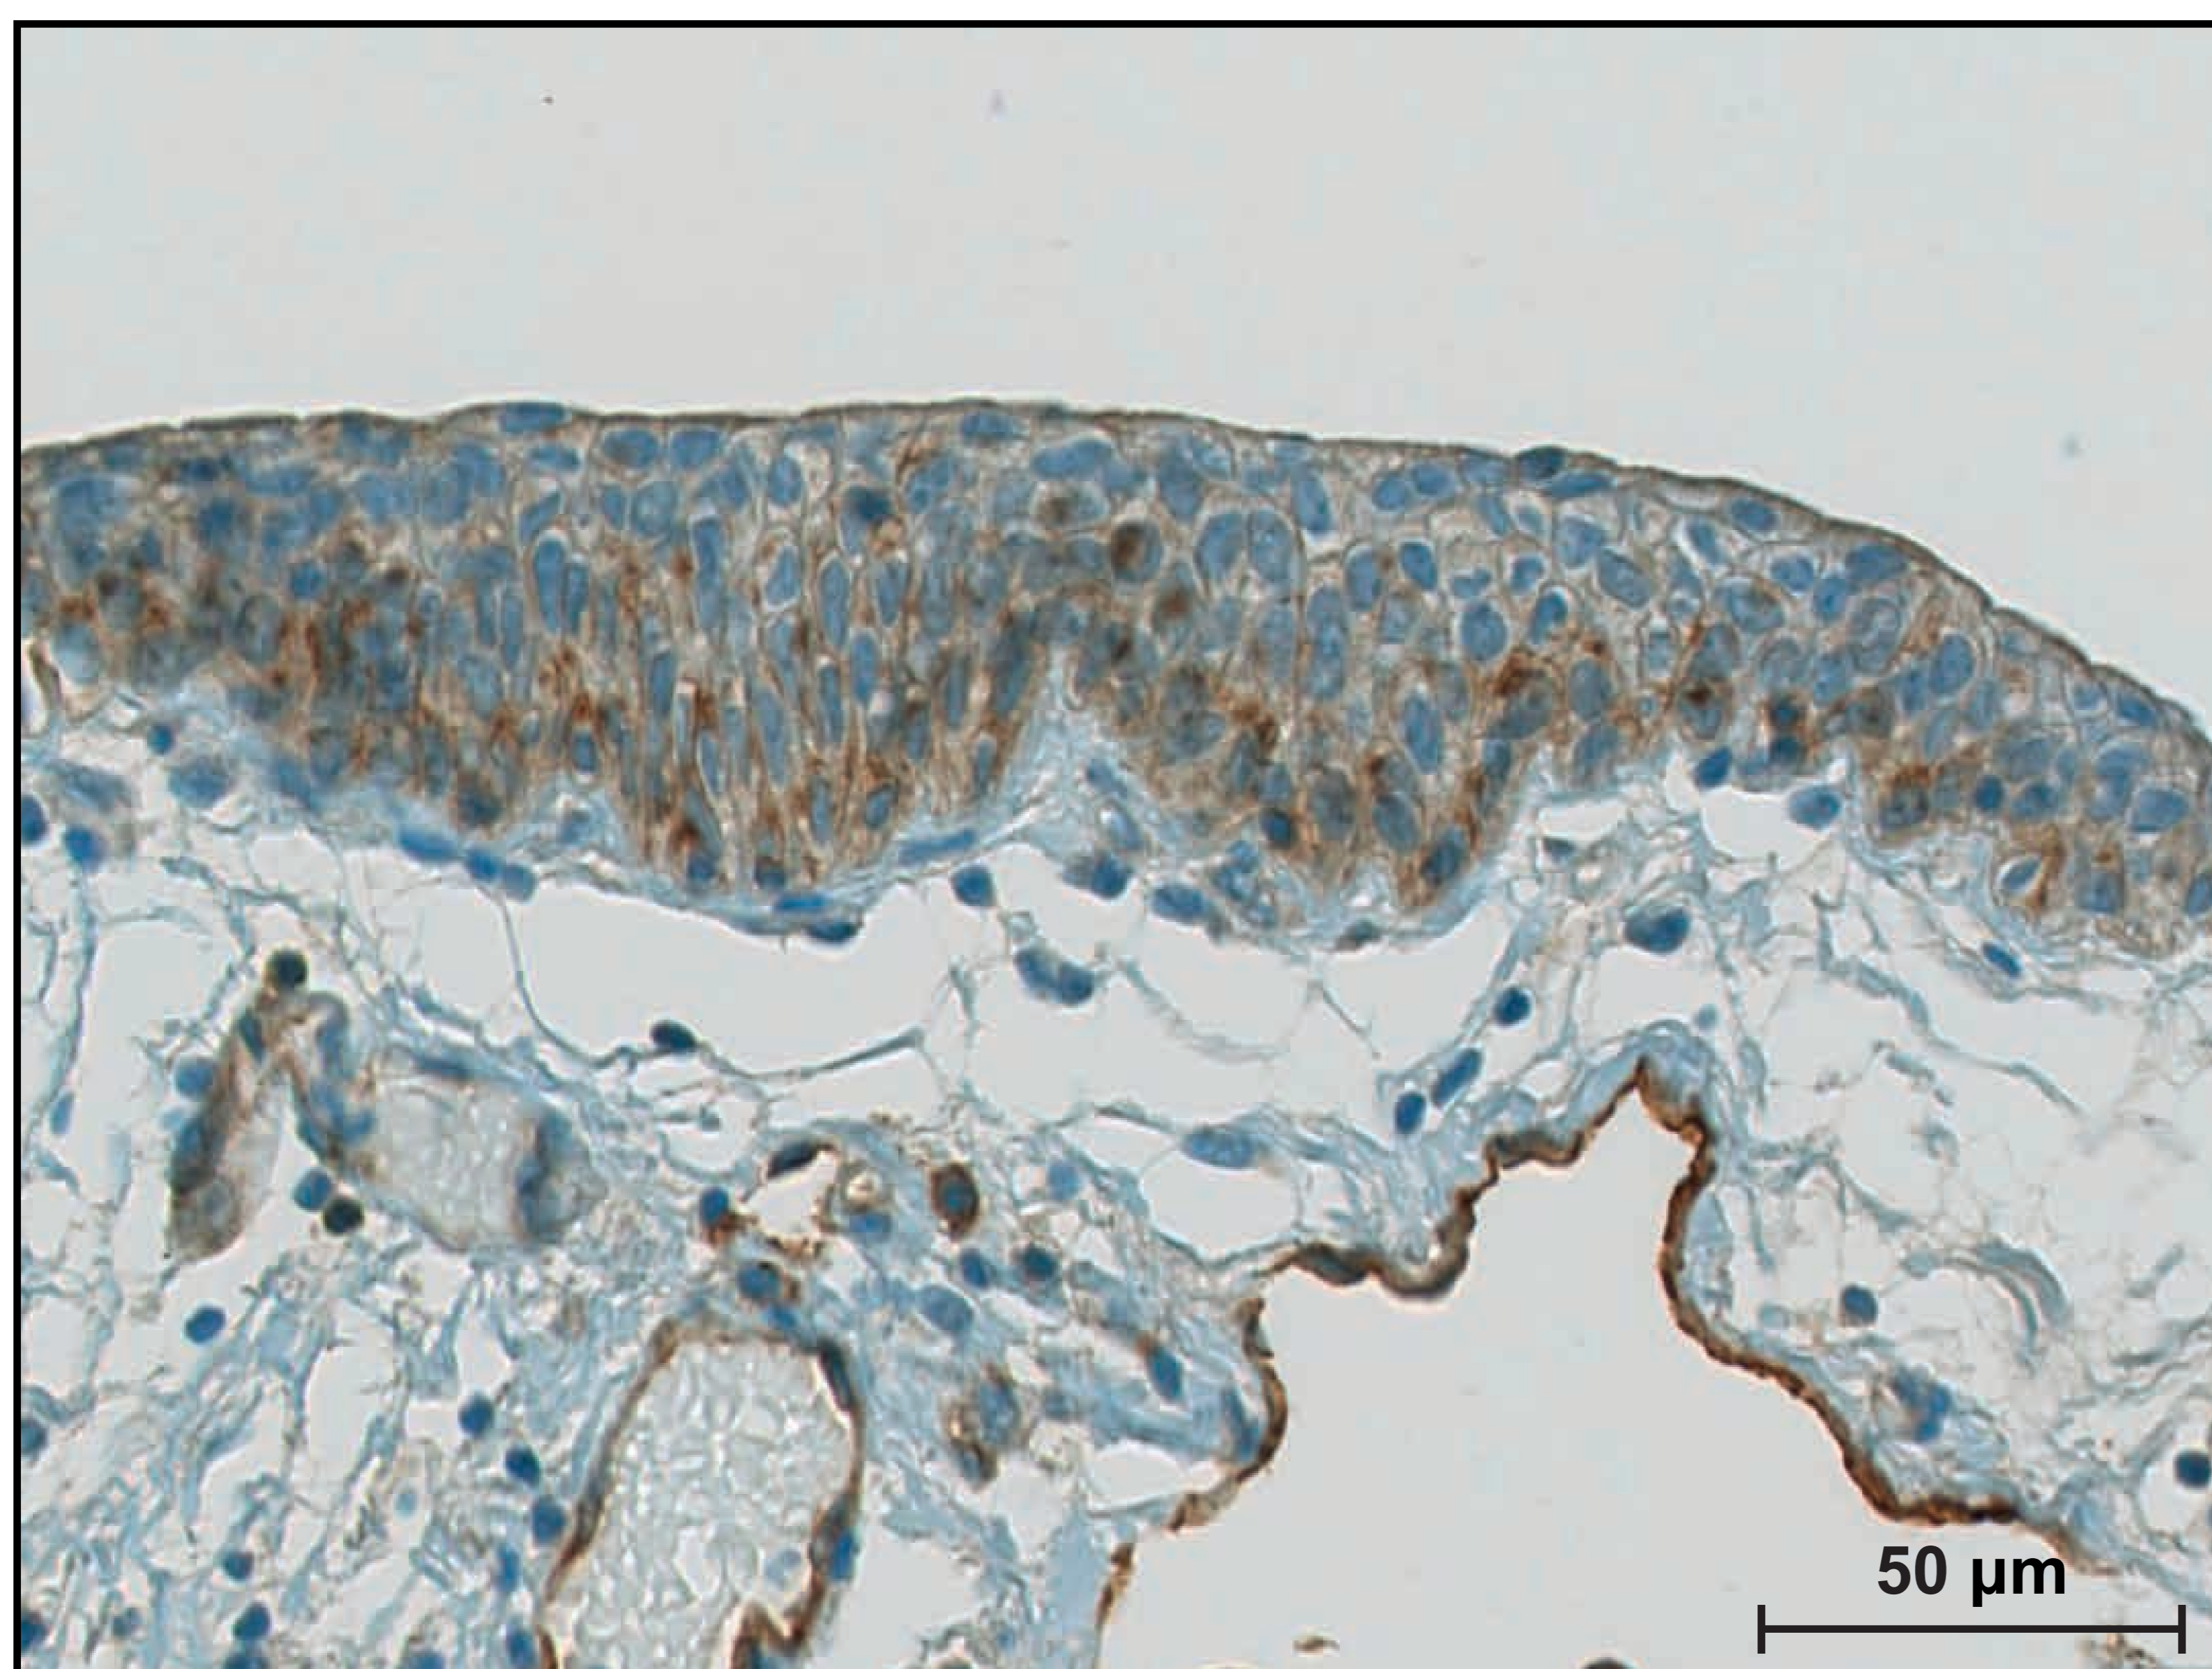**B**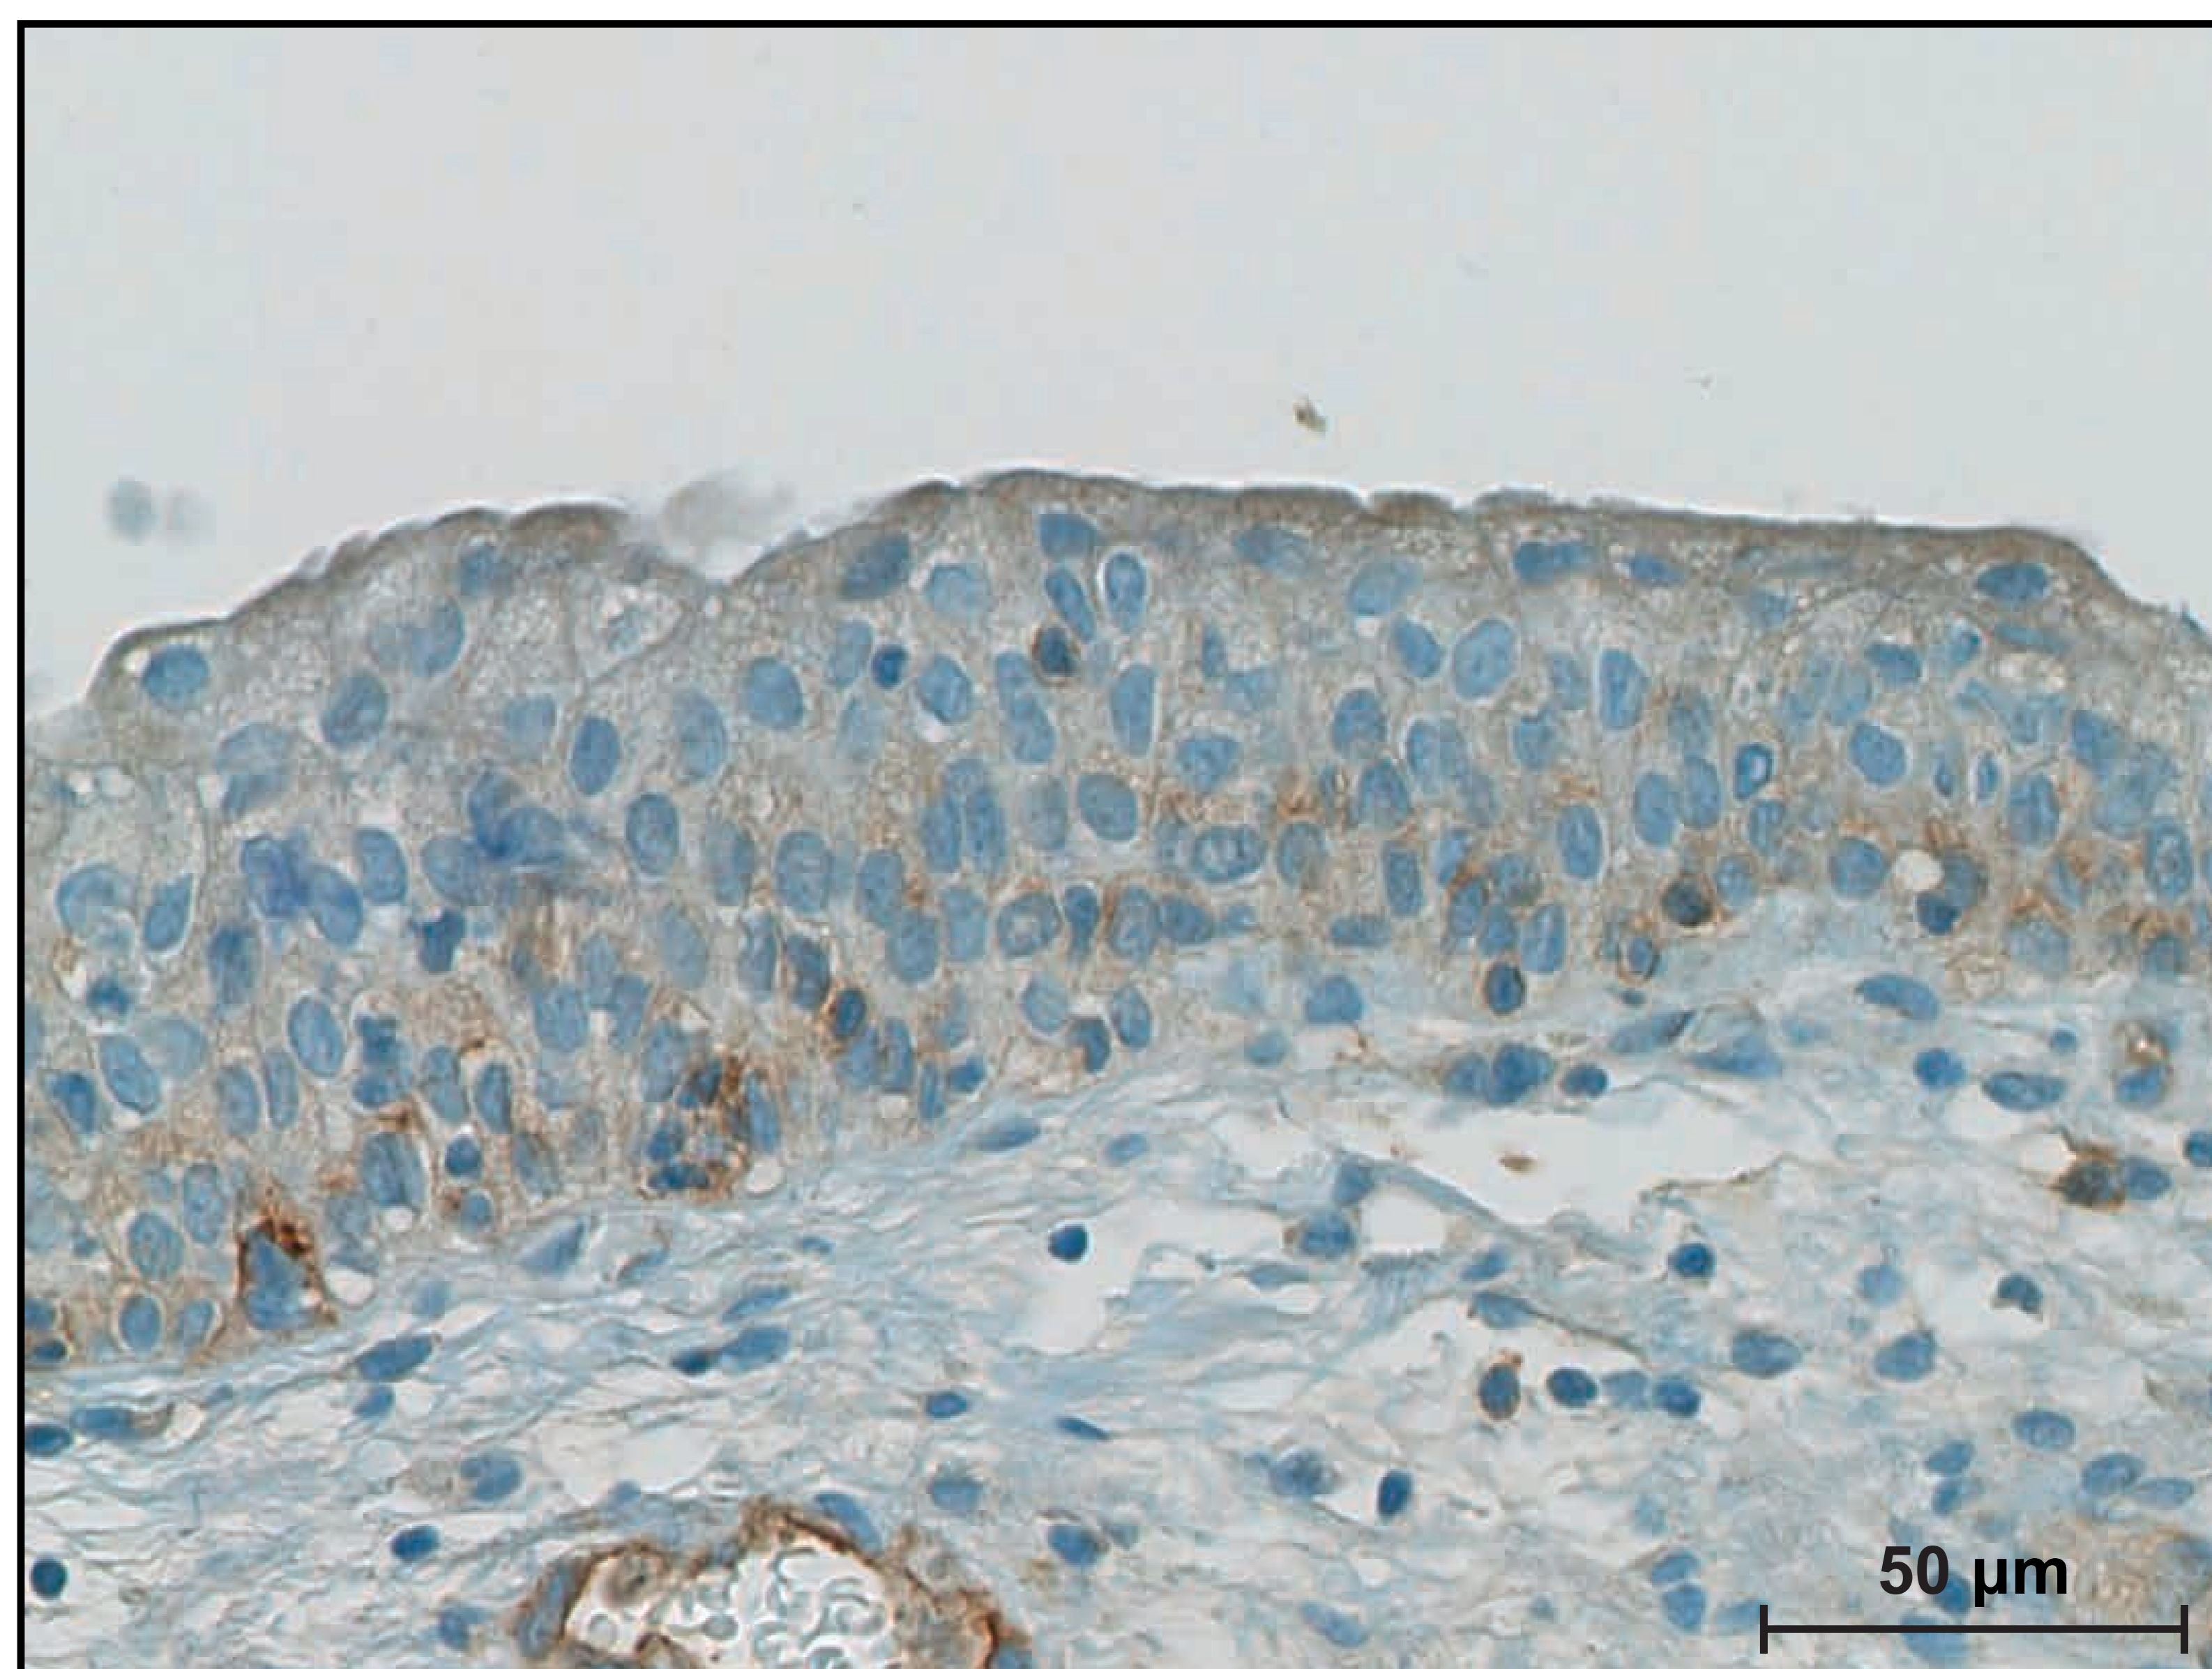**C**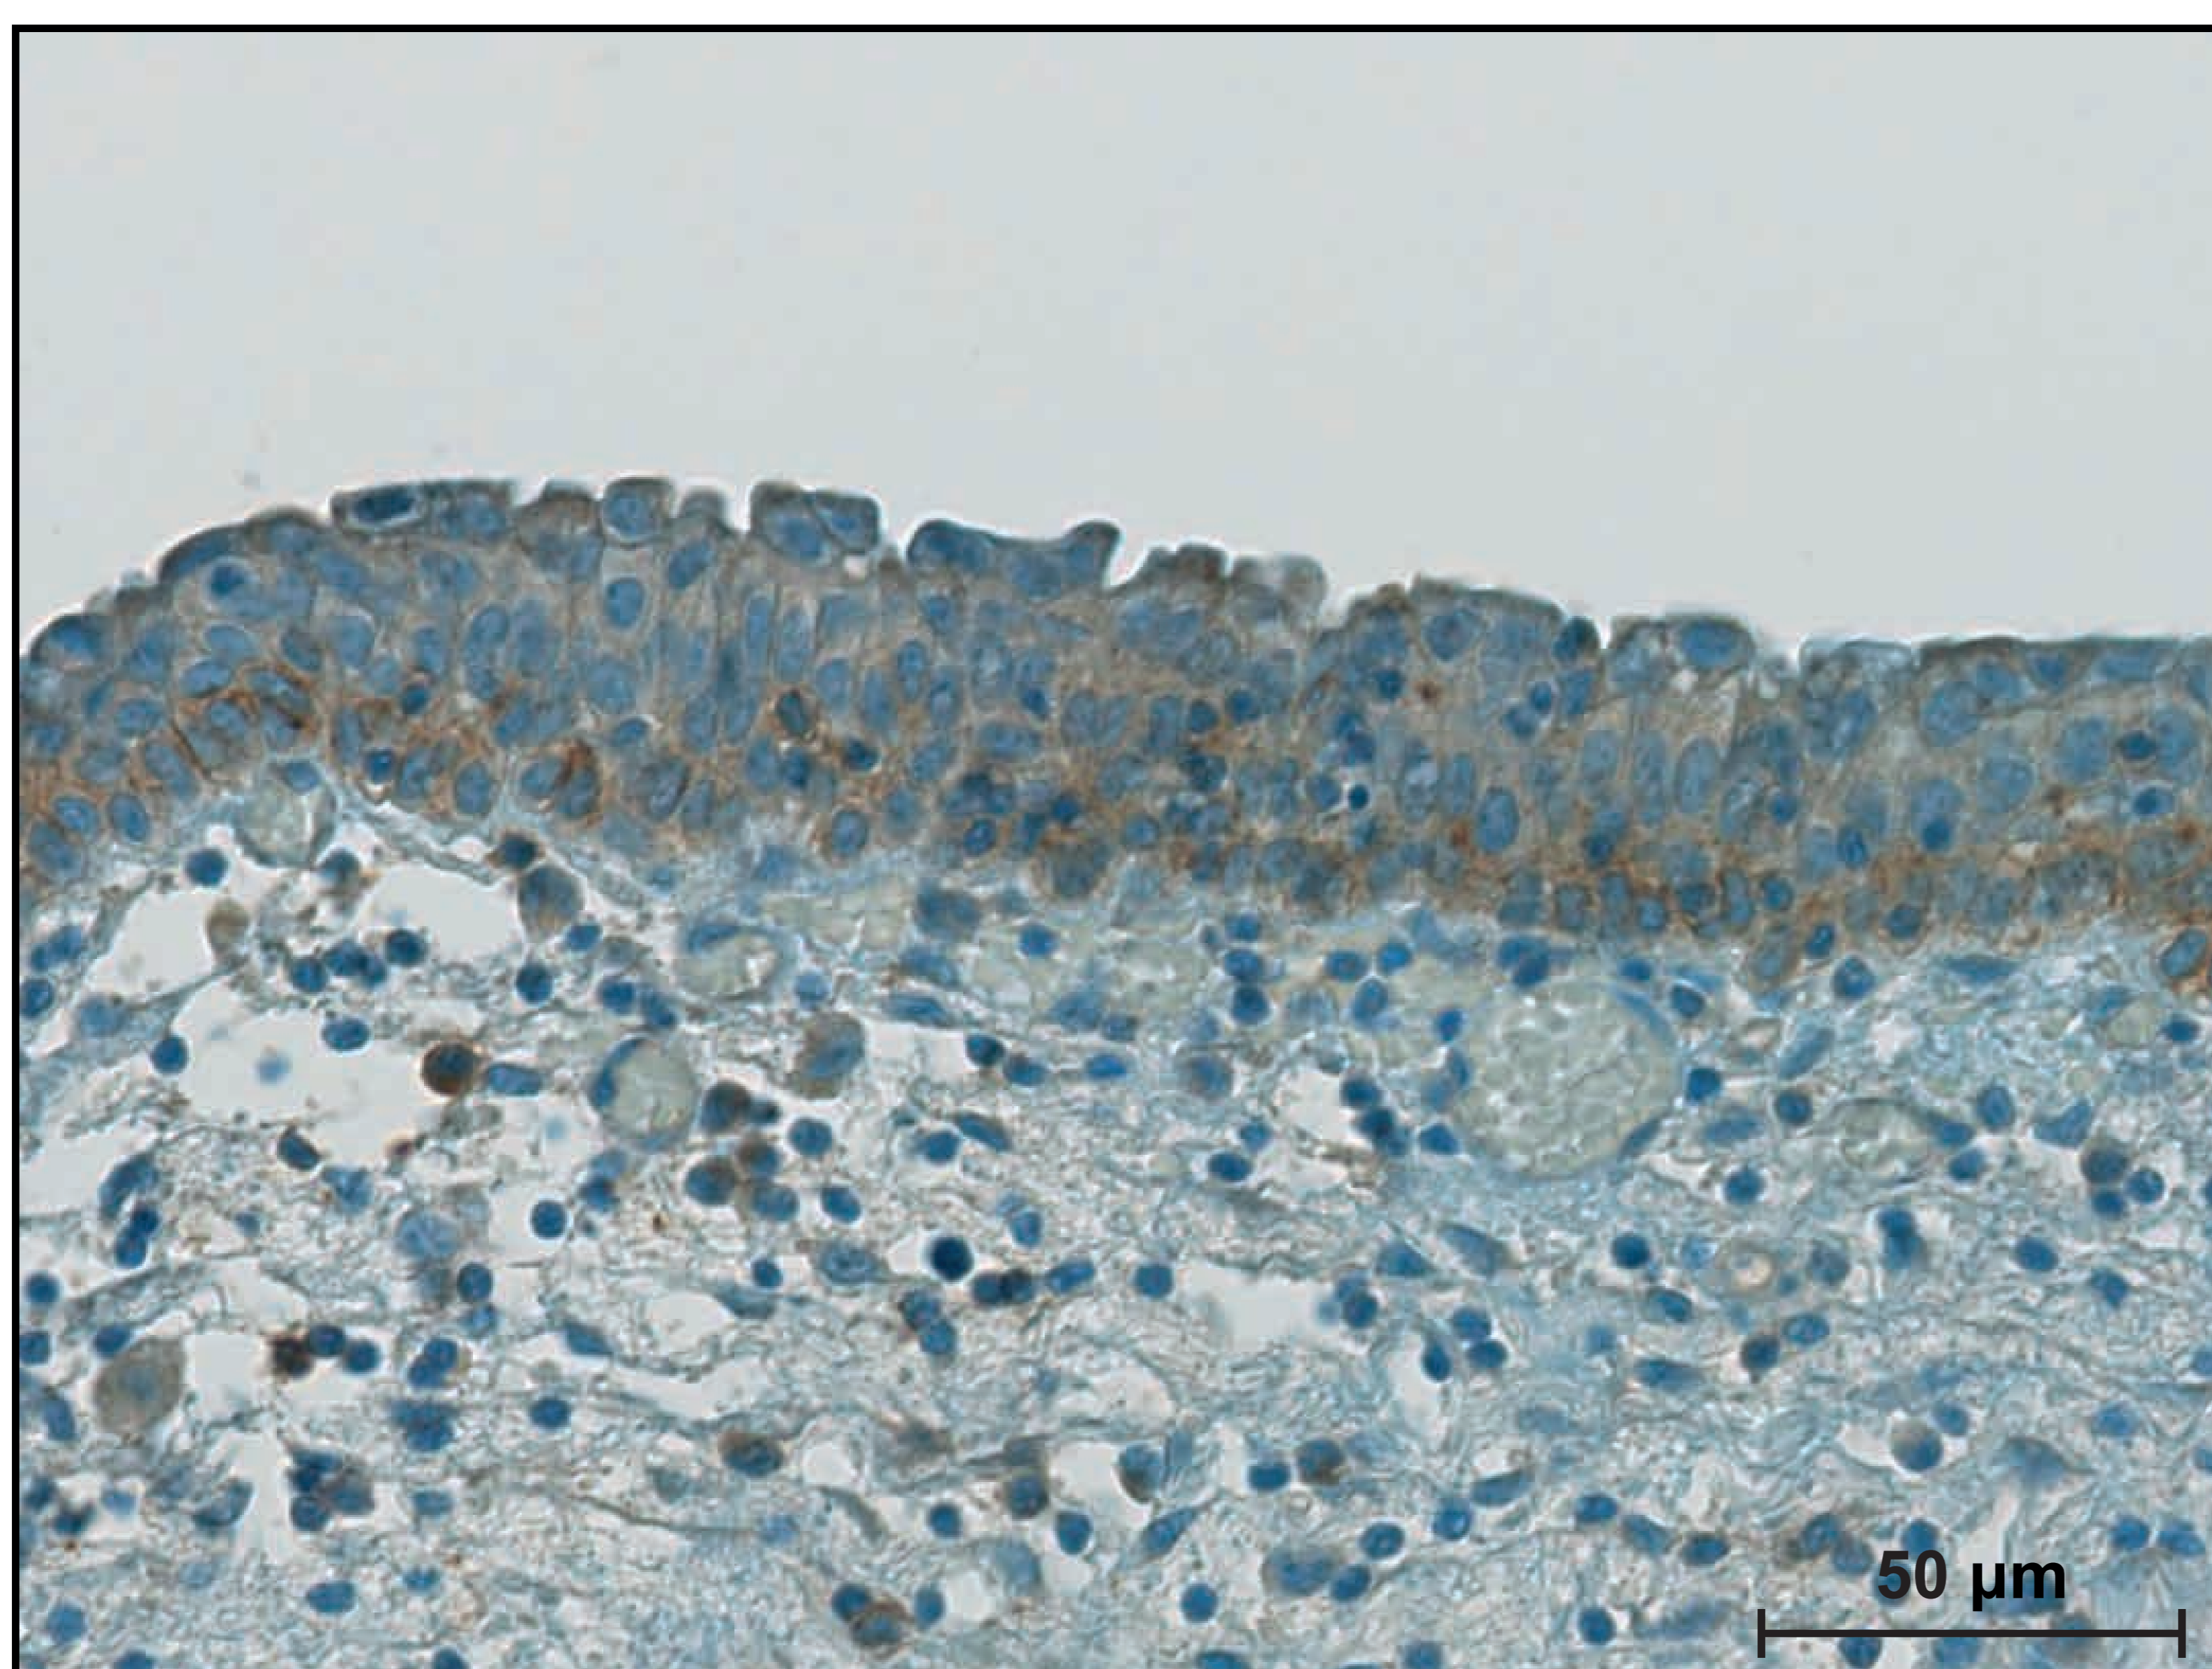**D**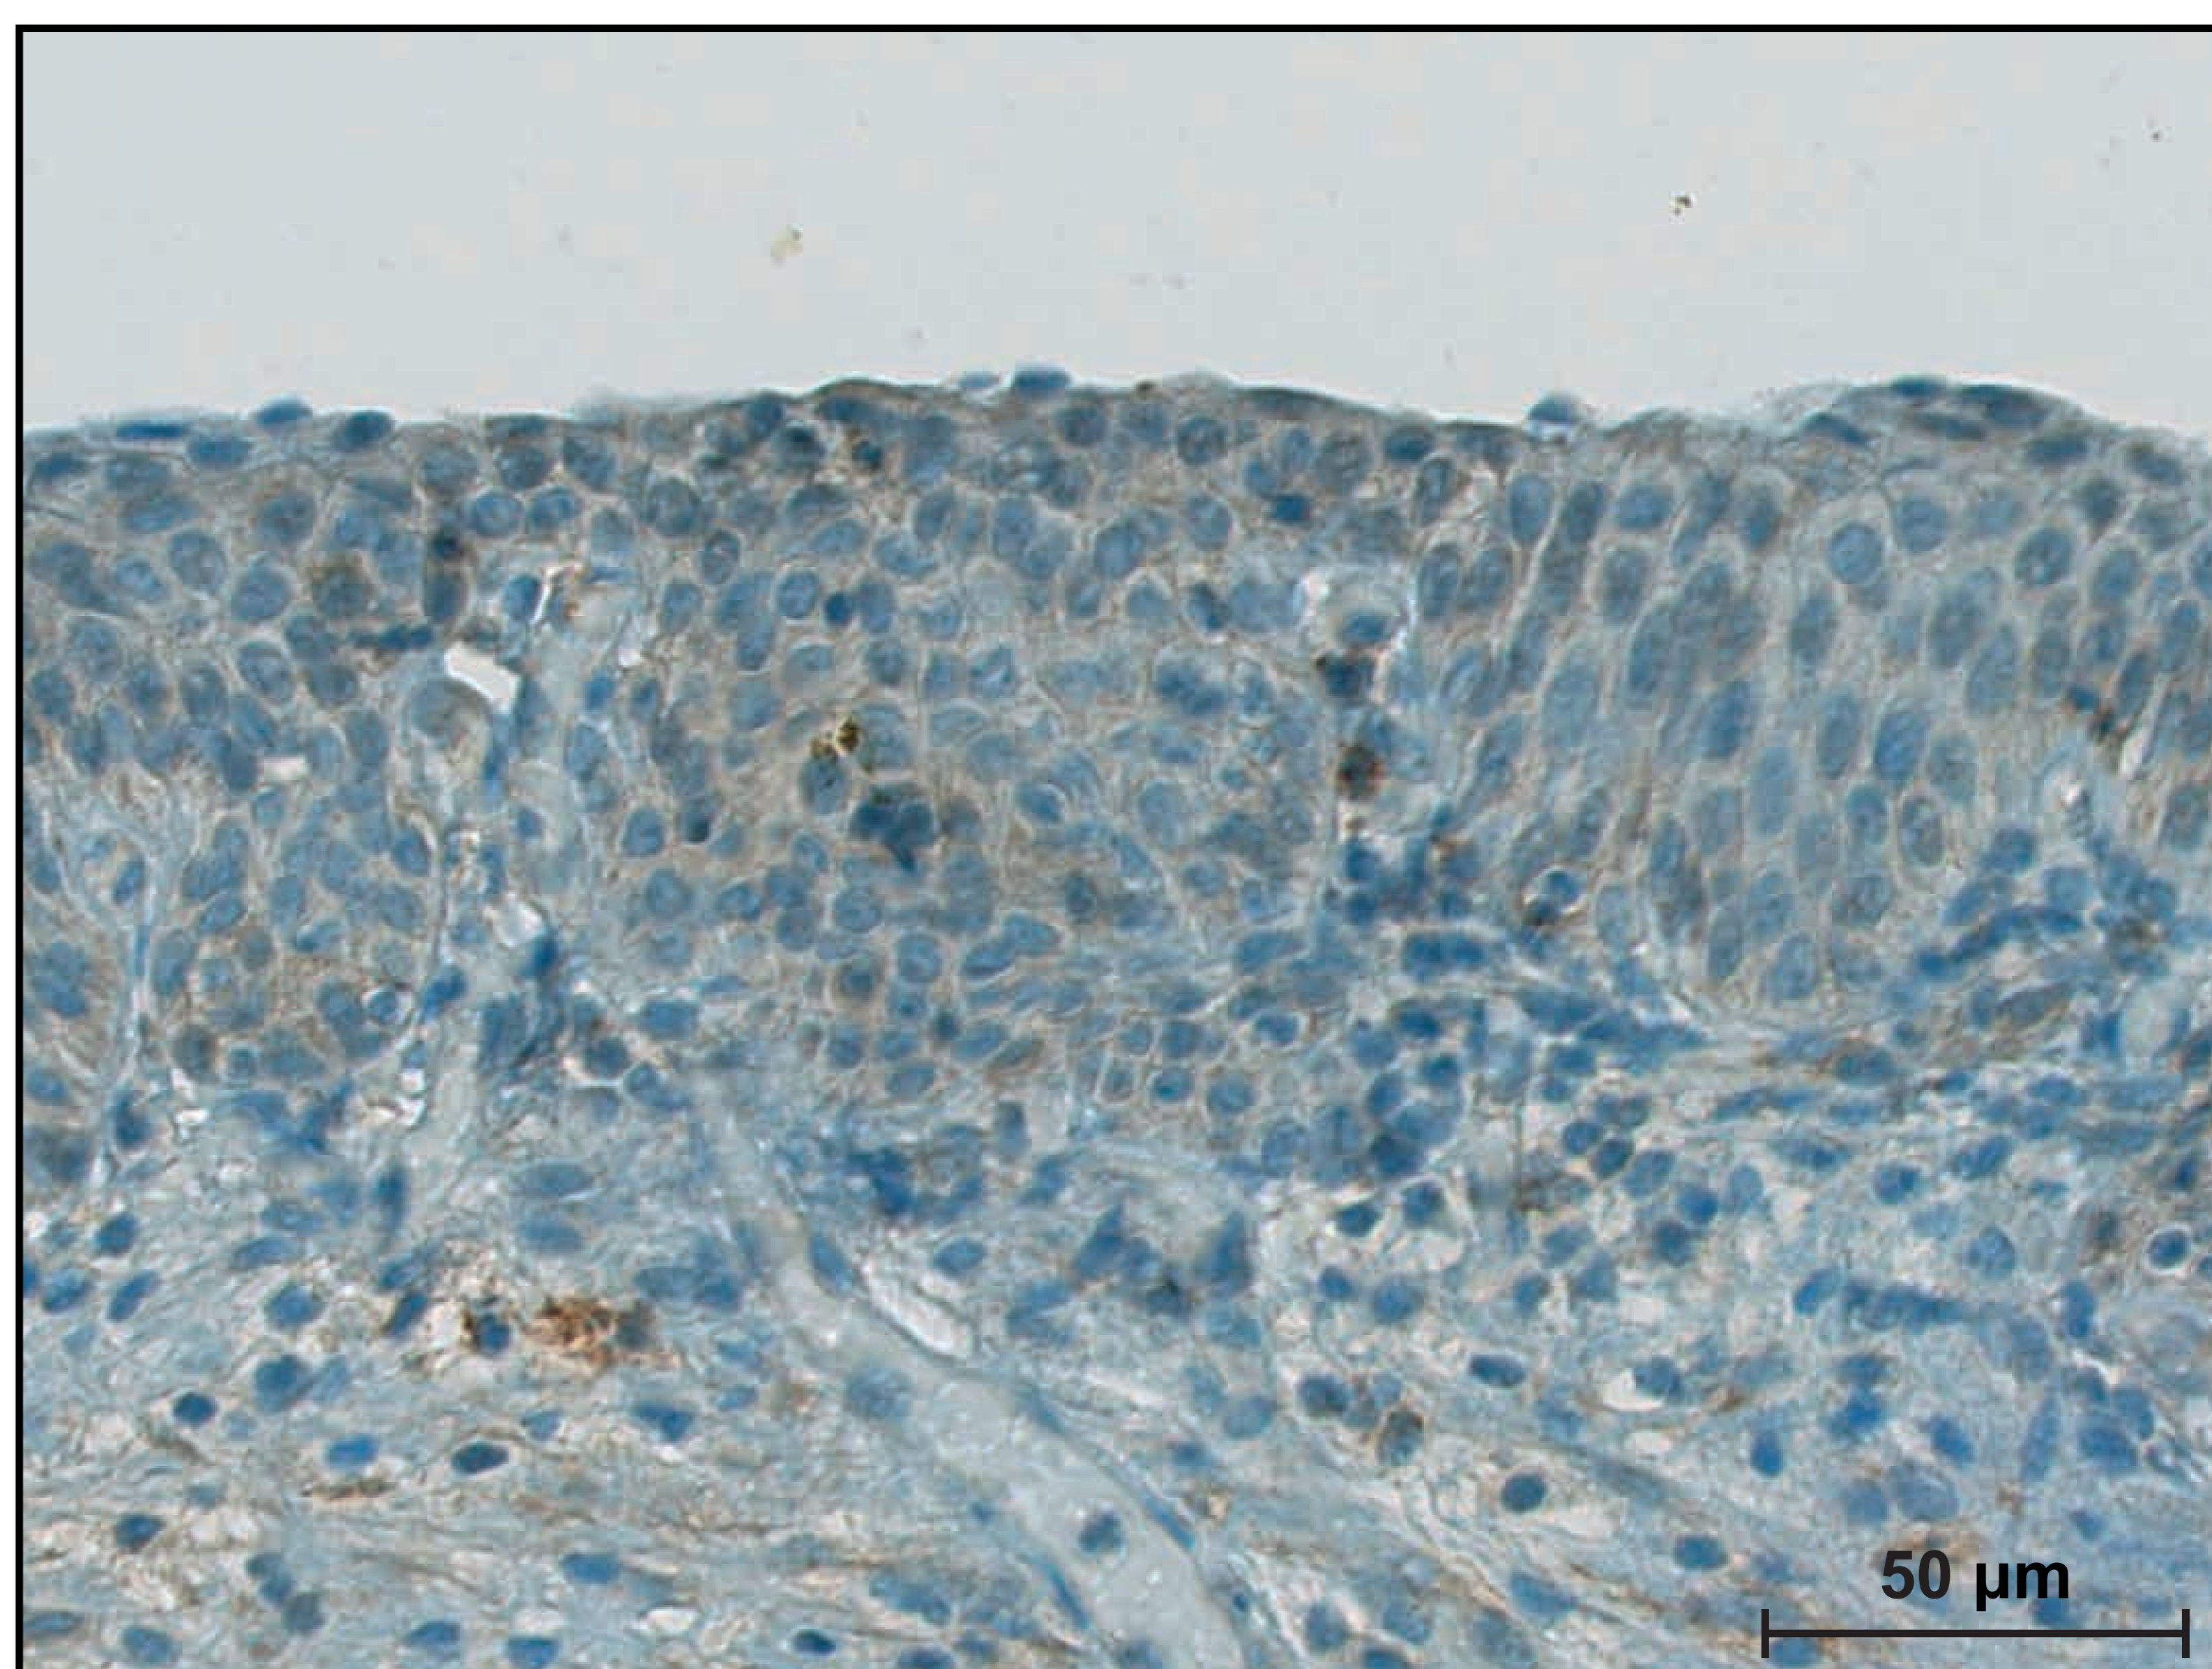**E**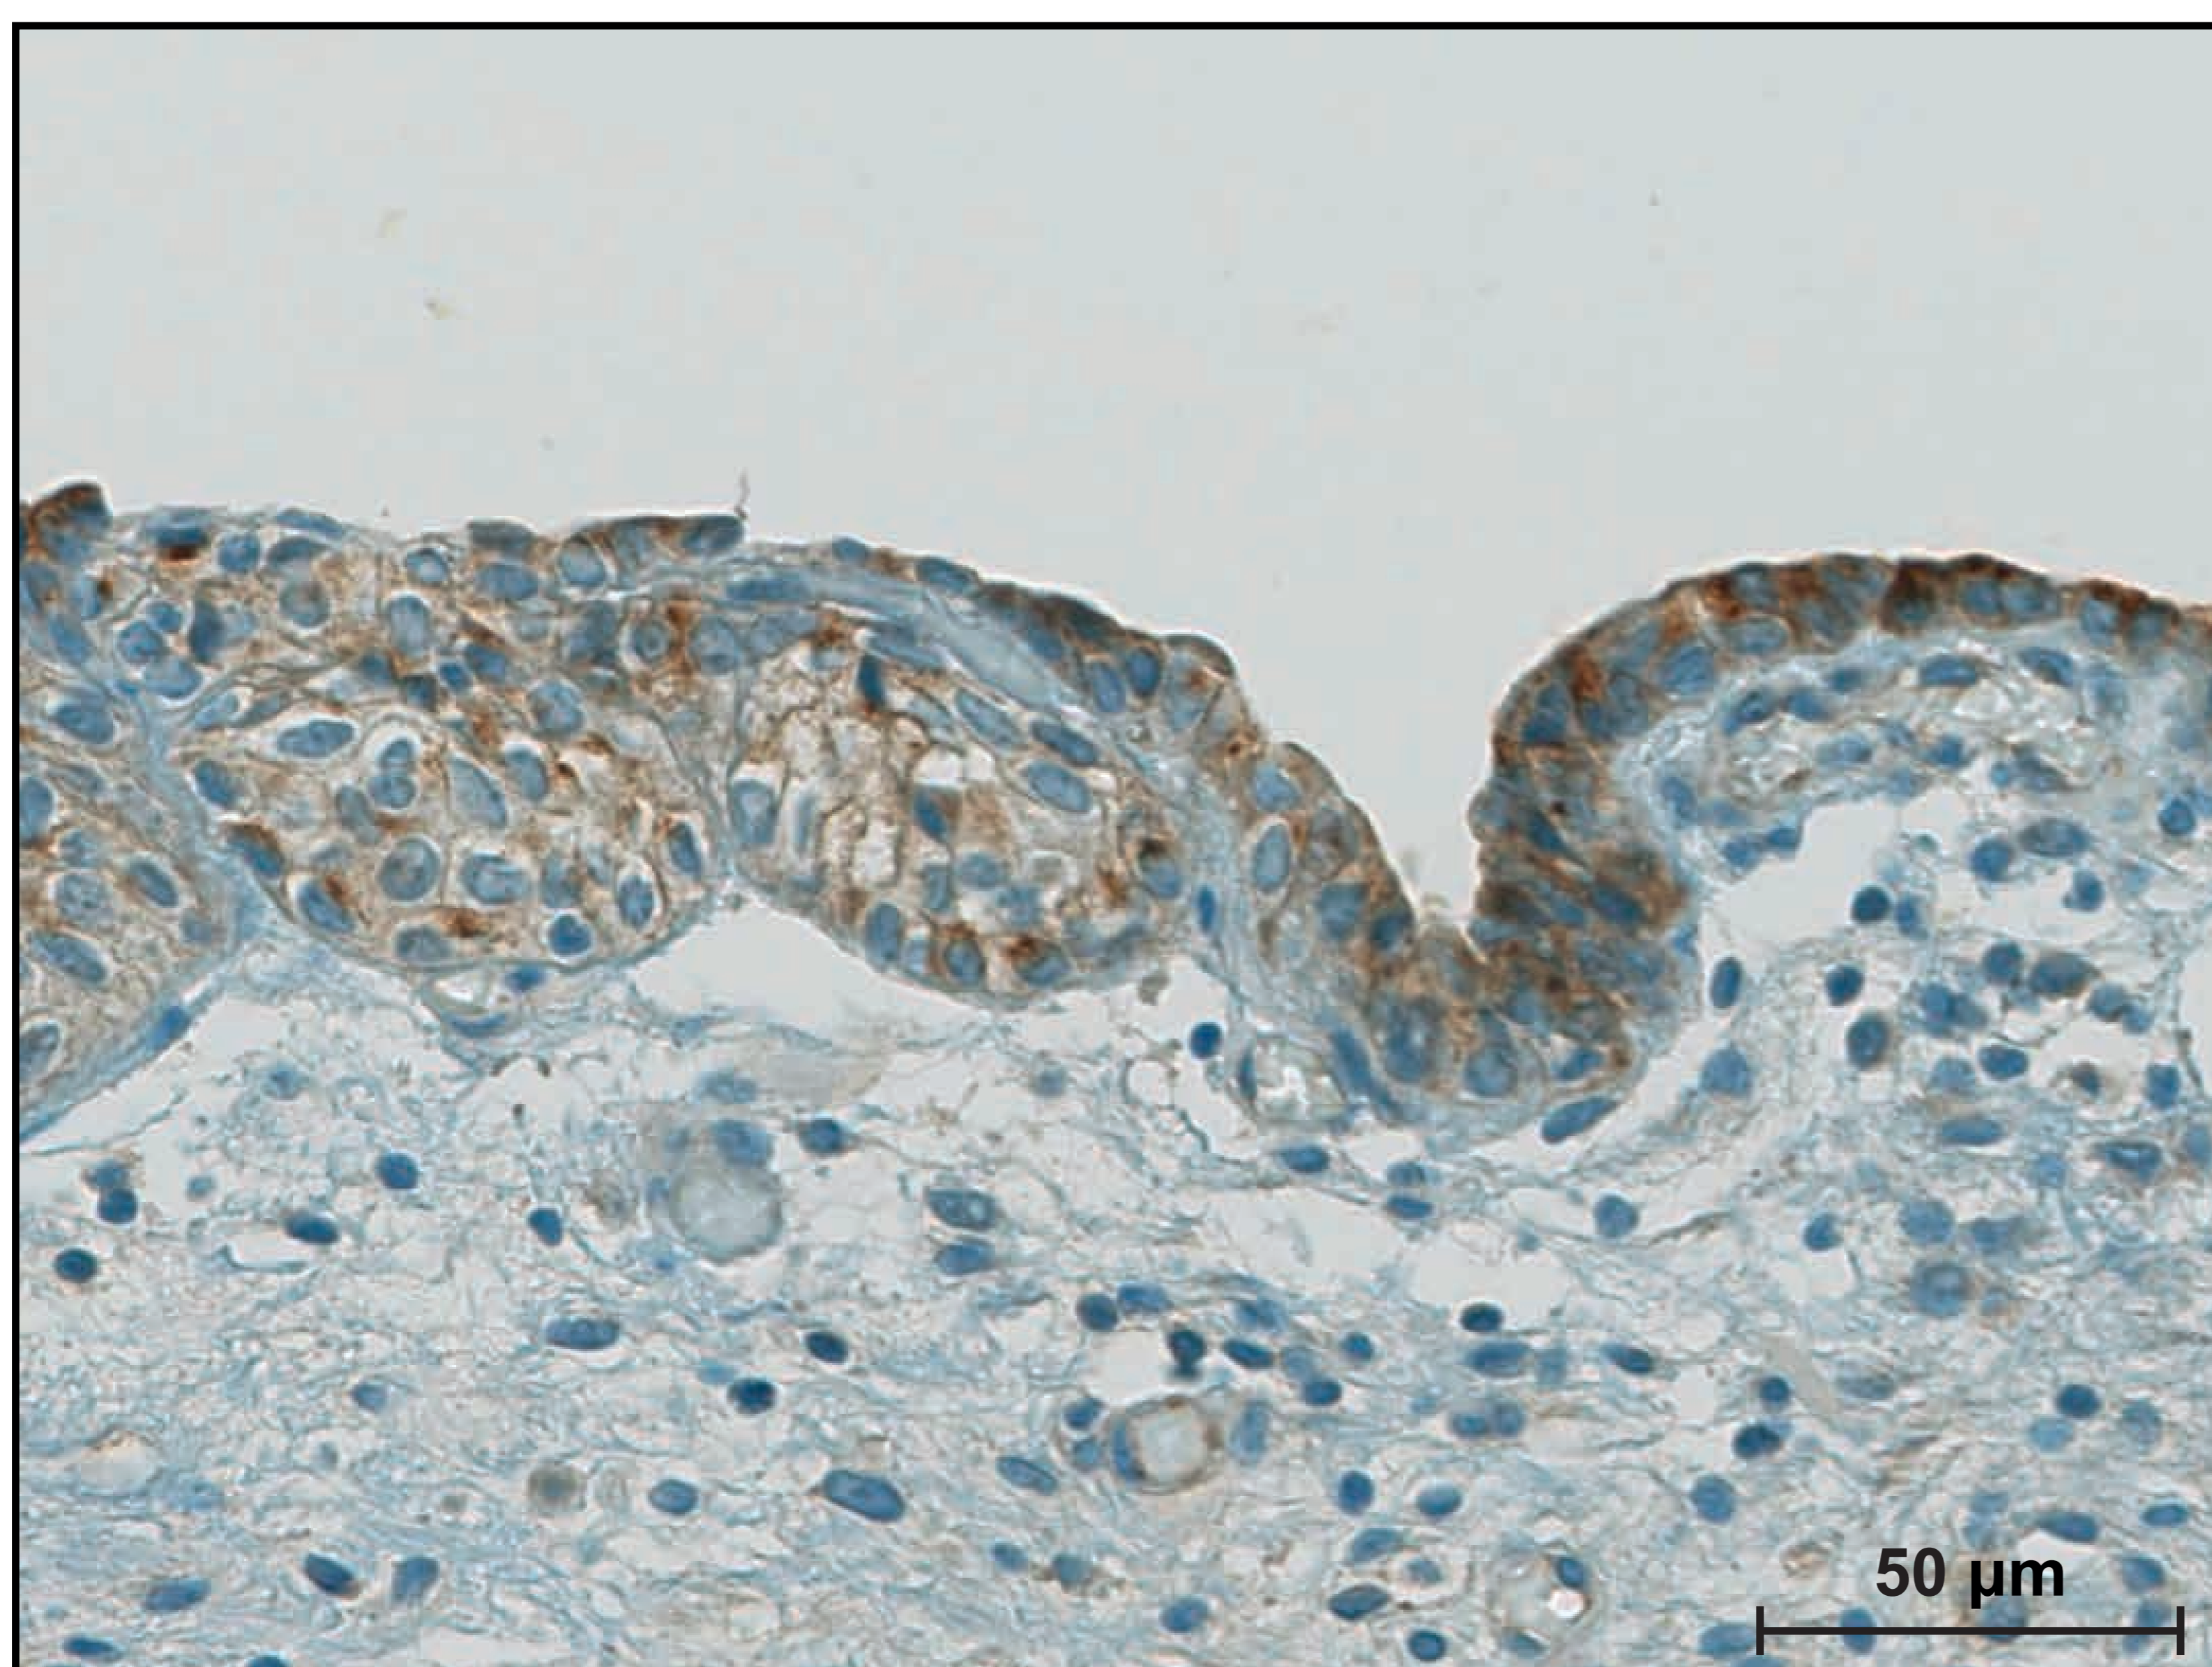**F**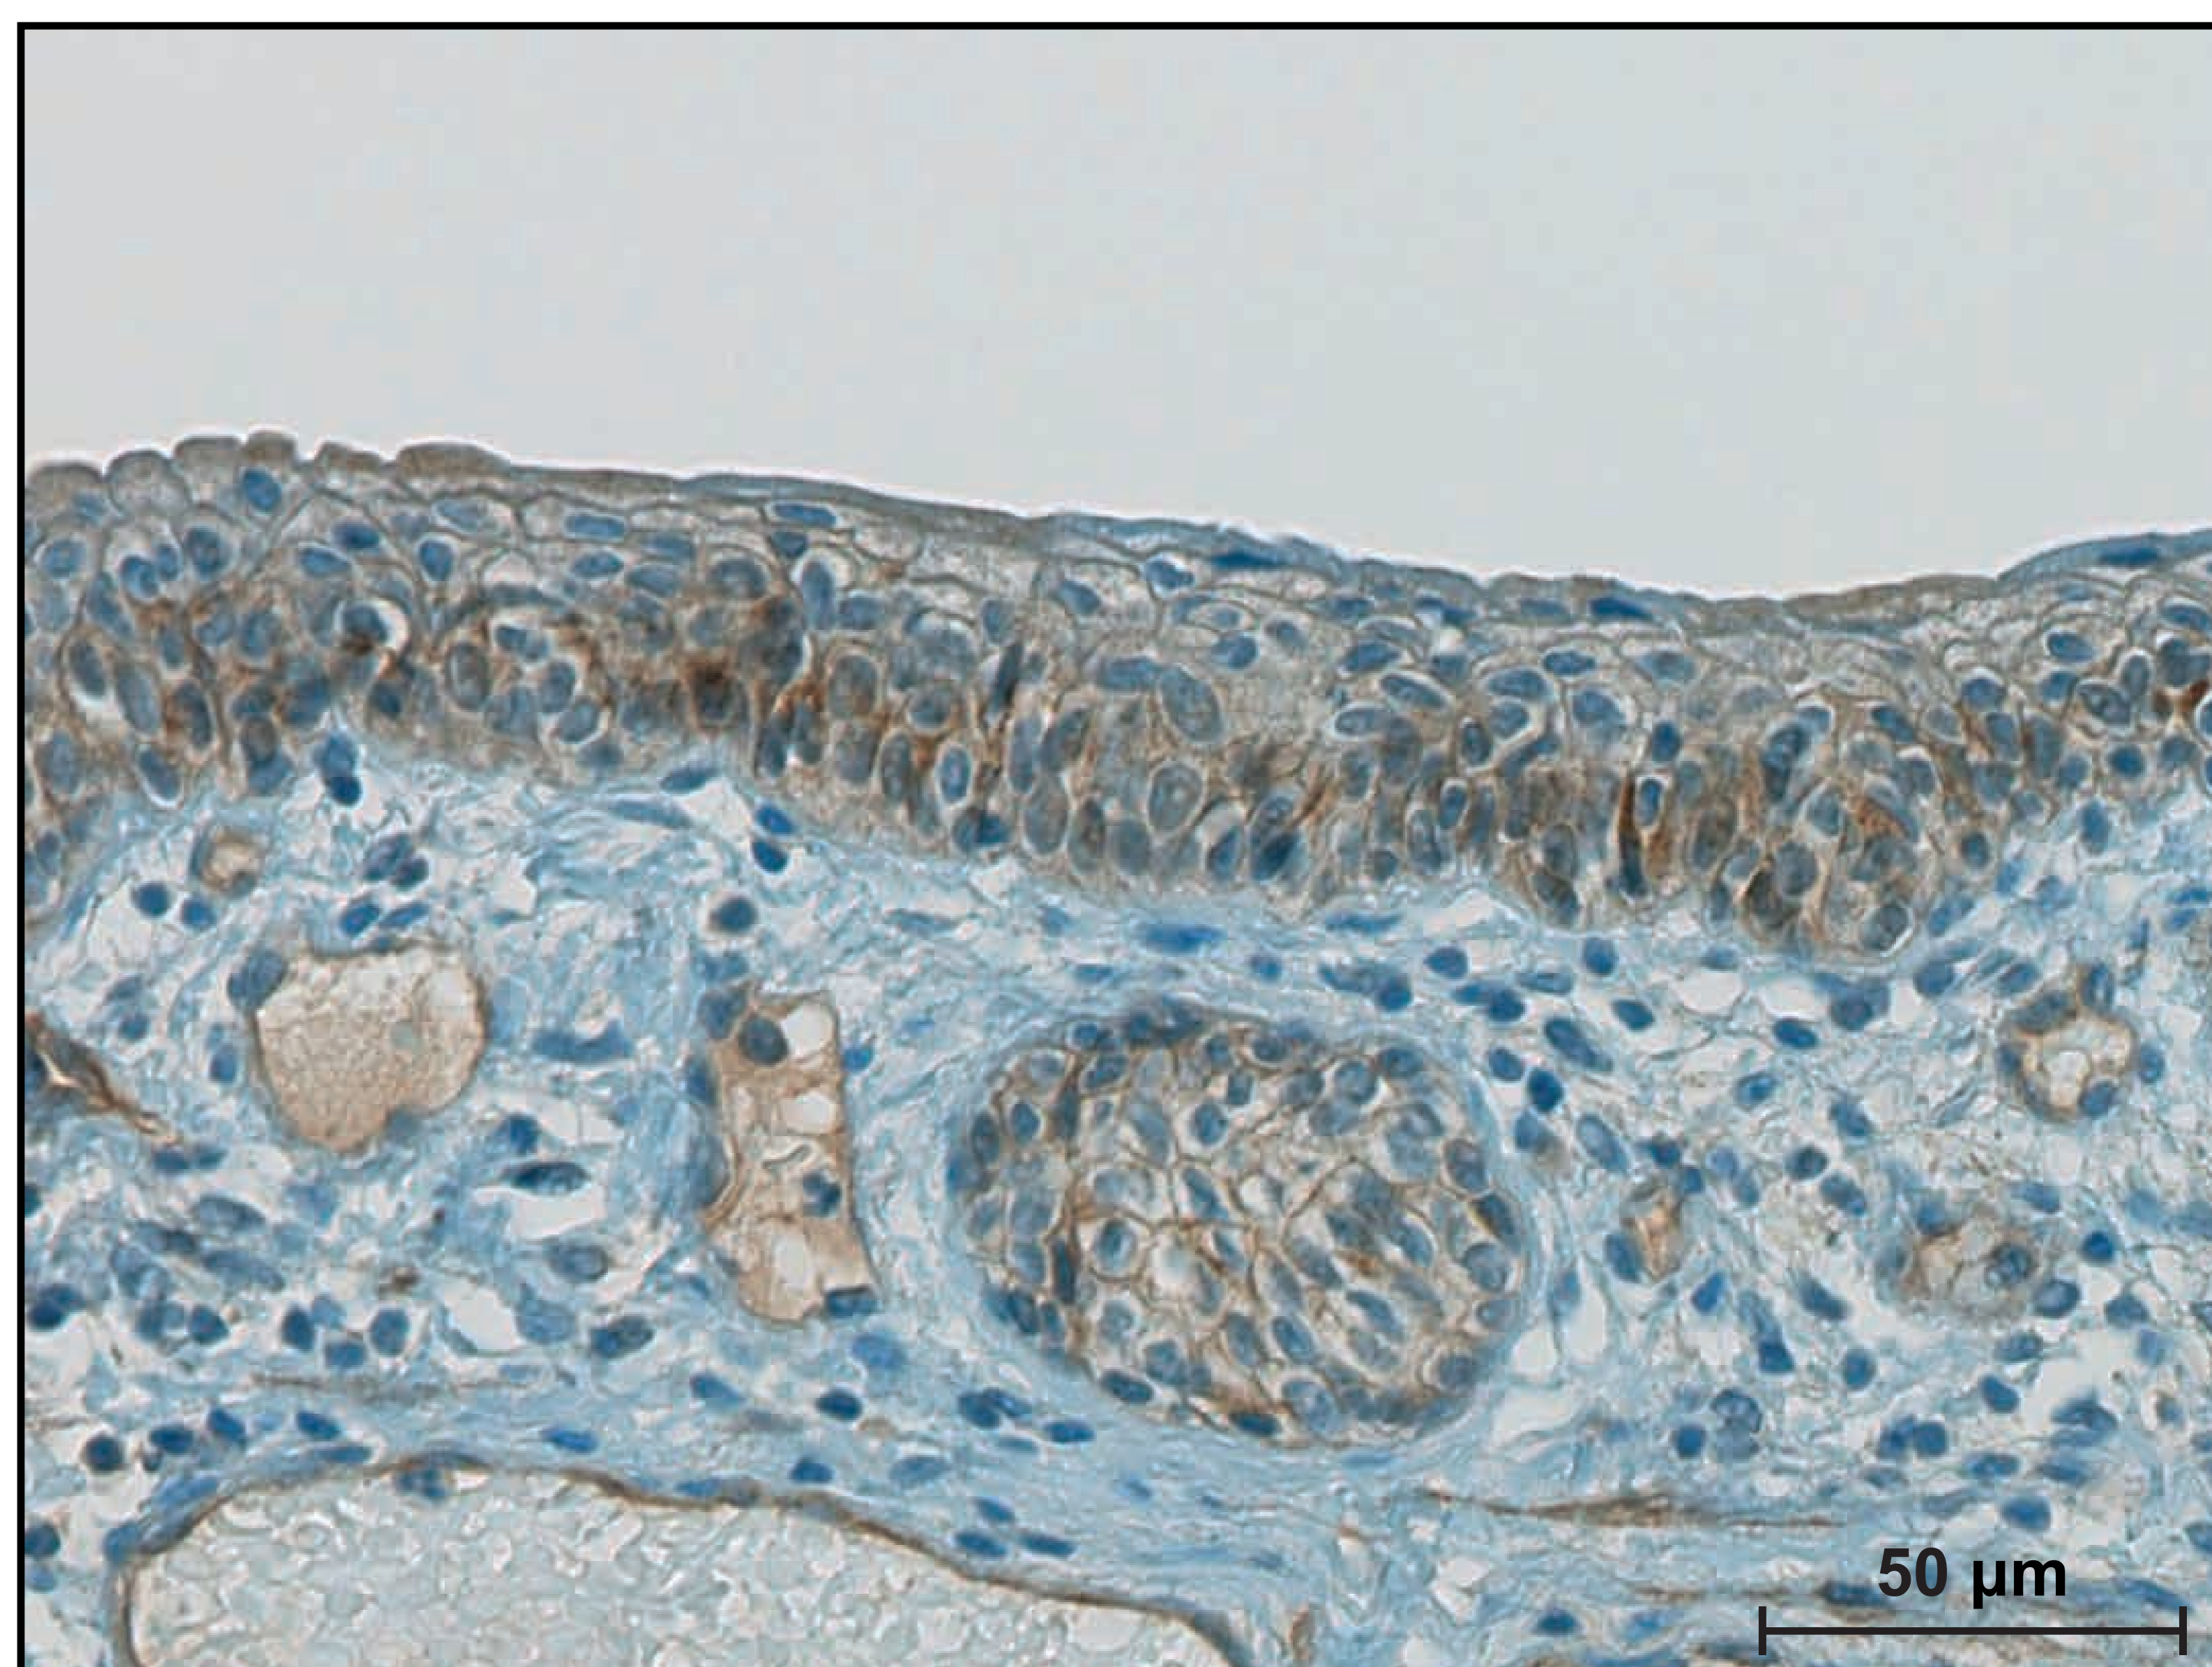

Supplement: f1 [file 785461.f1.pdf]
